# Supplementary material
Source: Springer Nature journal article supplement (https://www.springermedizin.de/resource/supplementary/12873_2010_110_MOESM6_ESM.pdf/9431442)

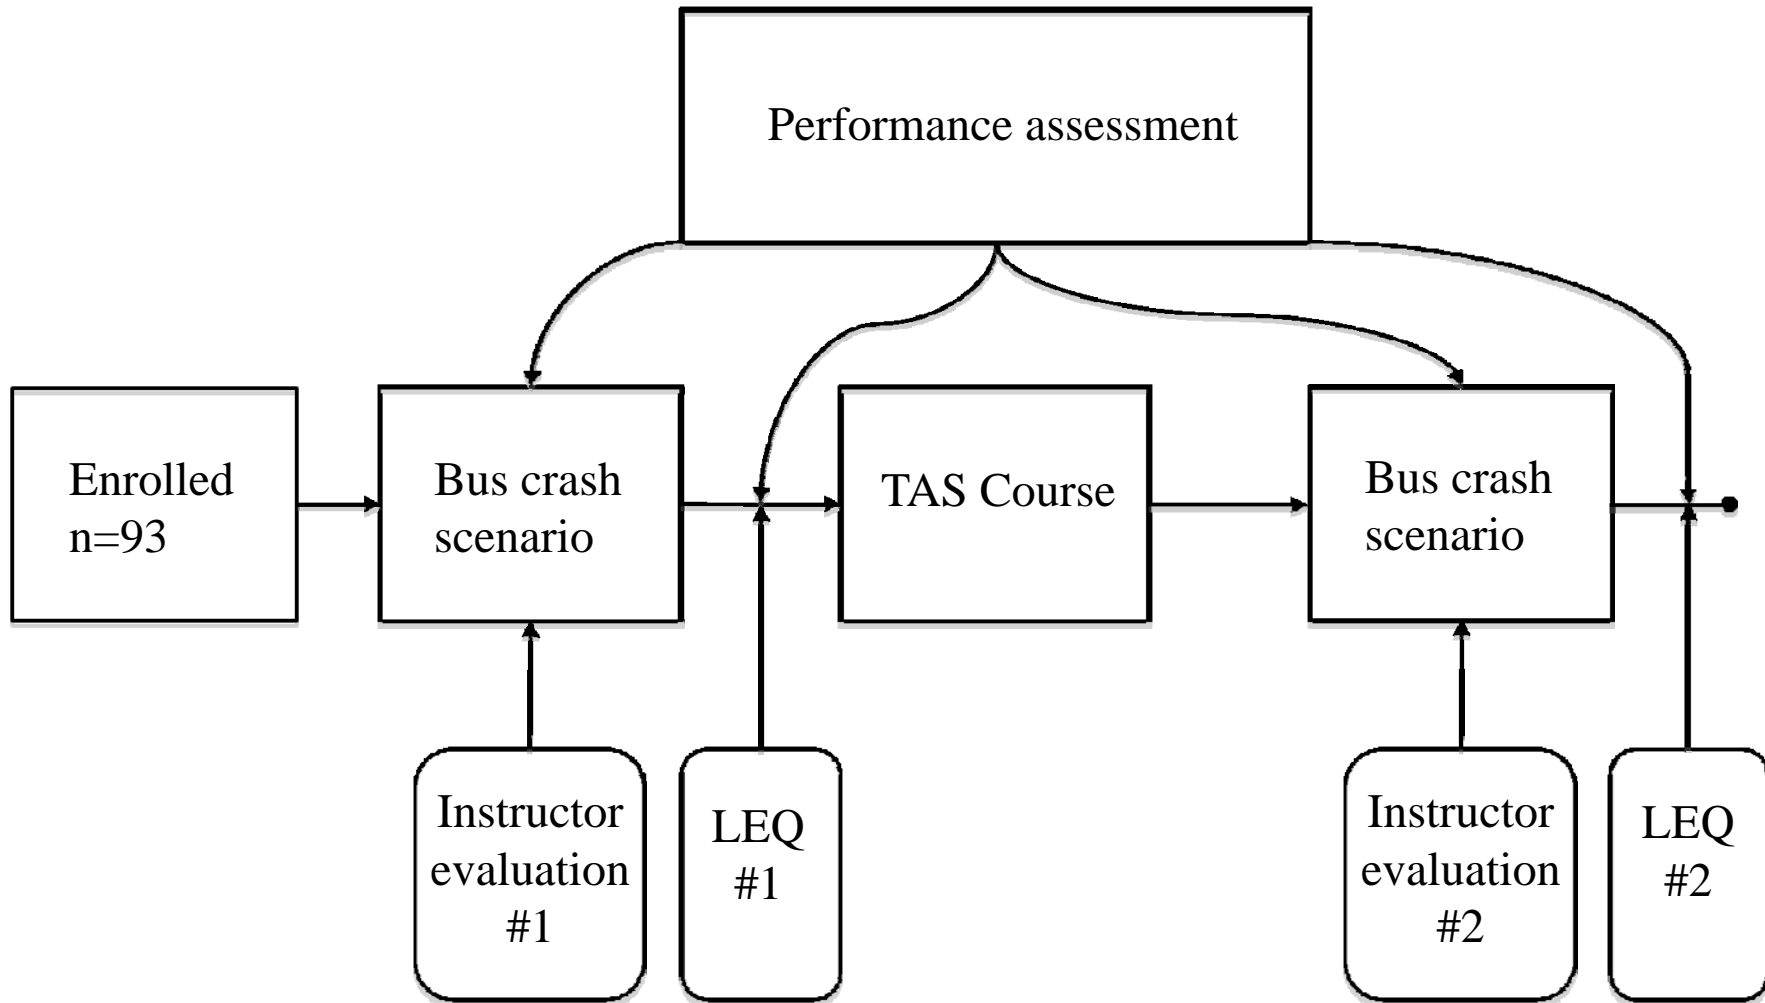

Supplement: MOESM6 [file 9431442]
